**Biting behaviour and infectivity of *Simulium damnosum* complex with *Onchocerca* parasite  
in Alabameta, Osun State, Southwestern, Nigeria**

Authors:

Busari Lateef Oluwatoyin, Osun State University, Osogbo, Nigeria

Professor Ojurongbe O.O, Ladoke Akintola University of Technology, Ogbomosho, Nigeria

Professor Adeleke M.A, Osun State University, Osogbo, Nigeria

Dr. Surakat O.A, Osun State University, Osogbo, Nigeria

## Abstract

**Background and Objectives:** A longitudinal study was carried out to investigate species composition, seasonal abundance, parity and transmission potential of *Simulium damnosum* complex in Alabameta community in Osogbo, Southwestern, Nigeria.

**Methods:** Adult *Simulium damnosum* complex were collected along Owena River, Alabameta, by two dark complexioned vector collectors from 07:00hr to 18:00hr weekly using collecting tubes from November 2014 to April 2015. The flies were morphologically identified and dissected for the purpose of detecting *Onchocerca* parasite using dissecting microscope. The Monthly Biting Rate (MBR) of flies was determined using World Health Organization standard formula.

**Results:** A total of four hundred and forty flies were collected during the study period with all of them identified as forest species of *Simulium damnosum* complex. There was significant variation in monthly collection of the flies with the month of November having the highest number of flies (194) (44%) while the month of April recorded the lowest number of flies (31) (7%) ( $p < 0.05$ ). The morning biting peak (09hr - 11hr) (137) was higher than the evening biting peak (15hr -17hr) (64) ( $p < 0.05$ ) while nulliparous flies (294) (67%) were more abundant than the parous flies (146) (33%) ( $p < 0.05$ ). There was absence of infection (zero infectivity) of the flies ( $p < 0.05$ ).

**Conclusion:** The zero infectivity in the flies indicates zero transmission of *Onchocerca* parasite in the community which if sustained over a period of time may signify the possibility of onchocerciasis elimination. Also, the presence of forest species of the flies reduces the risk of resident's exposure to blindness since the savannah species of the flies are responsible for this.

## Introduction

Among the filarial nematodes, the public health significance of *Onchocerca volvulus* cannot be overemphasized being the causative organism of the dreadful and debilitating disease onchocerciasis. Human onchocerciasis (river blindness) causes blindness and severe dermatitis in Africa and Latin America (WHO, 1976) and is the second leading cause of blindness (Dent and Kazura, 2011). Onchocerciasis is transmitted by members of *Simulium damnosum* complex through their bite while taking a blood meal (Yameogo *et al.*, 1999). Nine sibling species of *Simulium damnosum* complex have been taxonomically identified and documented in West Africa. The species include *Simulium sirbanum*, *S. damnosum sensu stricto*, *Simulium dieguerense*, *Simulium sanctipauli*, *Simulium soubrense*, *Simulium squamosum*, *Simulium yahense*, *Simulium leonense*, *Simulium konkorensis* (WHO, 1994). The first three species are known as Savannah flies which transmit Savannah strain of *O. volvulus* while the rest belong to the forest group and transmit the Forest strain of the parasite which causes more of skin diseases than blinding disease (Mafuyai *et al.*, 1996; Ibeh *et al.*, 2006). The congregation of adult worms and subsequent fertilization to produce microfilariae in the subcutaneous tissues has been known to elicit nodules (Opara *et al.*, 2005a).

It is known to be endemic in many tropical countries and over 18 million people are infected worldwide and 120 million people are at the risk of the disease (WHO, 1995). Onchocerciasis is most common in Africa while Nigeria probably has the highest burden of the disease (Oyibo and Fagbenro, 2003). Furthermore, Southwestern Nigeria (according to APOC rapid epidemiological mapping in 2008) was identified as one of the onchocerciasis endemic regions of the country. Earlier epidemiological studies showed that Alabameta is highly endemic with onchocerciasis with low community microfilarial load (Ojurongbe *et al.*, 2015).

The present study therefore provides information on species composition, seasonal abundance, parity and infectivity of black flies with a view to understanding its public health implication in and in planning effective control strategies in the study area and Osun State, Nigeria at large.

### **Materials and Methods**

**Study Area:** The Community is located in Ife South Local Government of Osun State, Southwest, Nigeria with an area of 730 kilometer square and a population of 135,338(2006 census). Owena River transverses the community and stretches towards Ondo State. The river usually produces rapids during the wet season and serves as a conducive breeding site for *S. damnosum*. However, during the dry season, the volume of water is usually drastically reduced to the extent that the rocks in the river are visible but does not become completely dry at all. Water from the river is used by residents to serve their domestic needs such as bathing and washing.

Alabameta lacks the necessary social amenities such as electricity, pipe borne water, hospitals, good roads, mobile phone and internet network and recreation centers expected in a human habitat. The major occupation of residents is farming.

**Ethical Clearance:** A written consent was sought and obtained from the Osun State Ministry of Health while informed consent was obtained from the human vector collectors before the commencement of the study.

**Collection of adult flies:** An intensive quest was made around the community to identify the breeding sites of black fly in the selected area. The major breeding site identified was the Owena River. The black flies were collected at the designated collection point along the bank of the river as well as the small bridge over it using human landing collectors weekly in accordance with the standard protocol (Adewale *et al.*, 1999; Adeleke *et al.*, 2010b) between November 2014 and

April, 2015. However, field study was not conducted in February due to pandemonium in the area which led to the vandalization of lives and properties.

Dark complexioned adults were used for human landing catches to eliminate the influence of colour variation in adult catches. Two adult fly collectors were positioned at the collection site between 0700hr and 1800hr to catch the flies and work alternately. The human vector collectors were instructed to expose the lower part of their legs and collect flies moving around the exposed leg to perch for blood meal using catching tubes. The numbers of flies caught hourly were recorded accordingly.

Morphological composition of species: Each of the collected flies was identified morphologically for classification into forest and savannah flies. The flies were identified using morphological characters as proposed by Wilson *et al.*, (1993). The morphological characters include the colour of the wing tuft, colouration of the forecoxa and abdominal tergite (Kurtak *et al.*, 1981; Garms *et al.*, 1982; Wilson *et al.*, 1993; Adeleke *et al.*, 2010c).

Detection of *Onchocerca* parasite in flies: The flies were dissected for parity and parasite infectivity using dissecting pins and dissecting microscope. The ovary of each fly was dissected to determine the parity and flies found to be parous was further dissected for onchocerciasis parasite. The head, thorax and abdomen of each parous fly was separately dissected in accordance with Adeleke *et al.*, (2010) and Garms *et al.*, (1982). The parous rate, biting rate and transmission potential of the flies was determined in accordance with WHO (1994).

Determination of biting rate: The biting rate of the black flies was determined from the Monthly Biting Rate (MBR):

$MBR = (\text{number of flies caught} \times \text{number of days in the month}) / \text{number of catching days}$  (WHO, 1994).

Data Analysis: The data from the study was subjected to T-test and Chi-square to determine the significant difference in dynamics and transmission potential of black flies during the period of the study. All analysis was performed using SPSS version 17.

## Results

A total of 440 black flies were caught during the study period (between November and April, 2015) with the month of November having the highest number of flies (194) while the month of April recorded the lowest number of flies (31)(Figure 1). There was a significant decline in the number of flies collected in each month ( $p=0.041$ ;  $p<0.05$ ). The reflection of this was observed in the reduction in MBR in each month. November recorded the highest MBR (1940 bites per fly) while April had the lowest MBR (465 bites per fly) (Figure 3).

Furthermore, all the flies caught during the study period were forest flies (Figure 2).

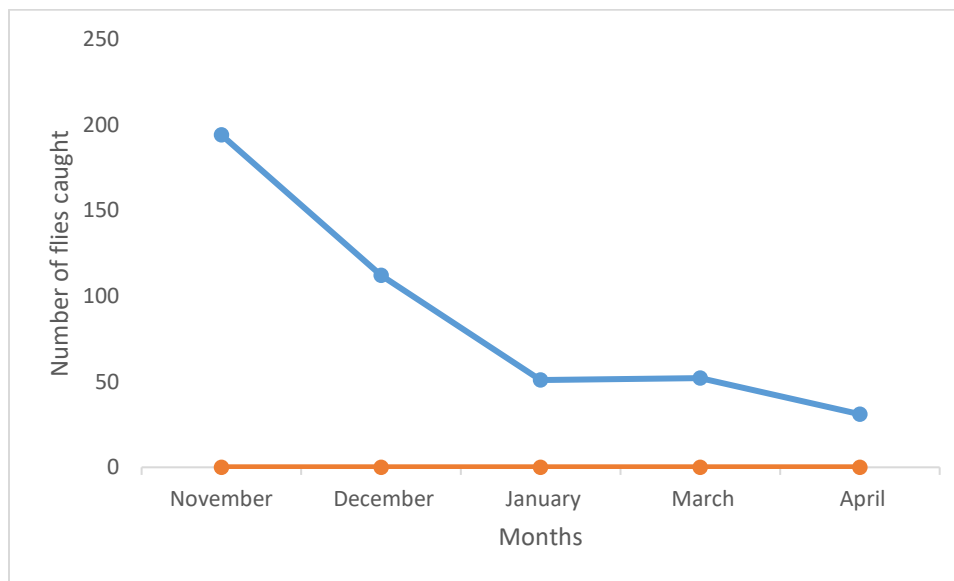

Figure 1: Monthly distribution of *S. damnosum* in the study area

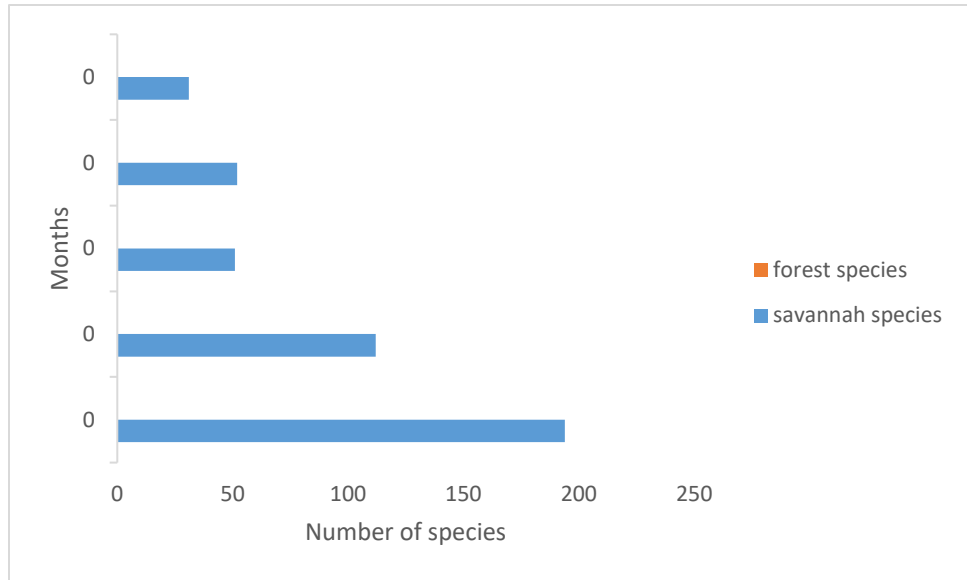

Figure 2: Monthly distribution of species into forest and savannah in the study area

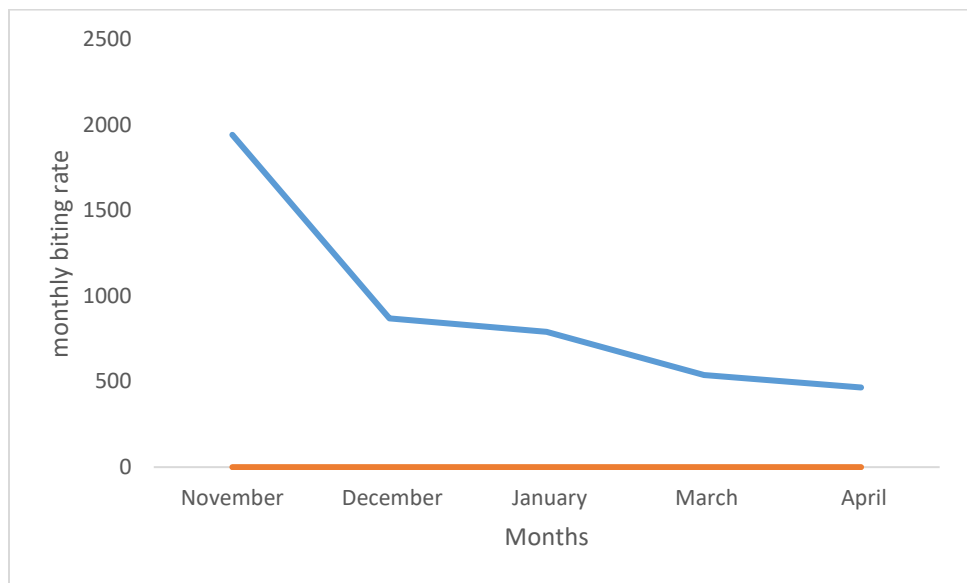

Figure 3: Monthly Biting Rate of *Simulium damnosum* complex in the study area

There was a noticeable variation in the morphotaxonomic features of the adult flies. Most of the flies had completely pale wing tuft 01 or A (29%), 05 or E (27%), 02 or B (22%), 04 or D (19%) and 03 or C (3%).

The biting rhythms of the flies indicated that there was a significant variation in their biting behaviour on an hourly basis. Two biting peaks were observed at the study site. The biting activities of the flies were higher between 09hr – 11hr and 15hr - 17hr in all the months during the study period except in November where the second biting peak was observed between 13hr – 15hr (Figure 4). Furthermore, the biting peak between 09hr – 11hr was significantly higher in November and January ( $p<0.05$ ) as compared to other months. However, the evening biting peak was not statistically significant in all the months during the study period ( $p>0.05$ ). The difference between morning and evening peaks were statistically significant throughout the period of the study ( $p<0.05$ ).

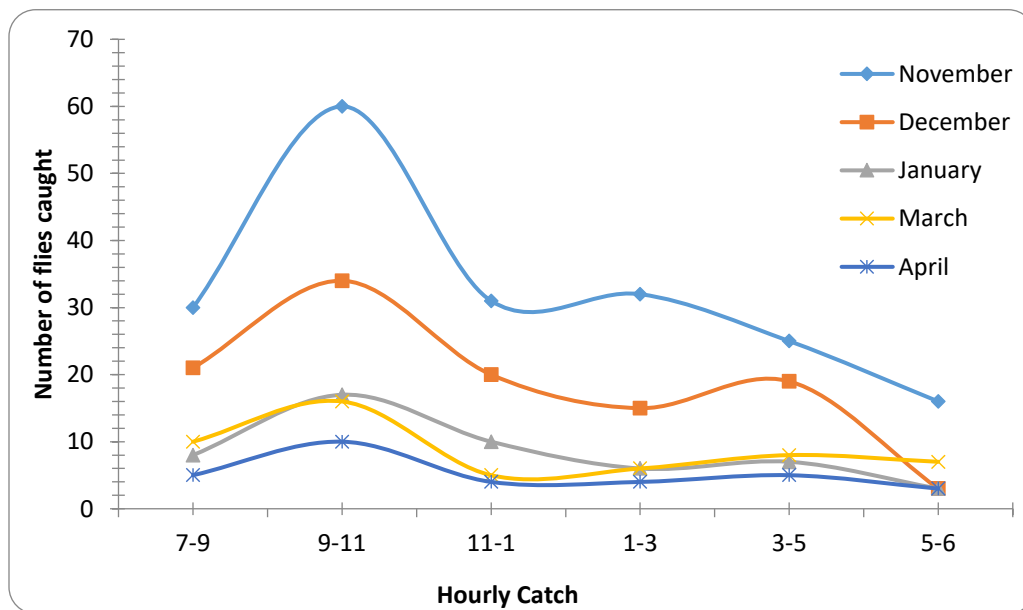

Figure 4: Monthly Biting Rhythm of the flies in the study area



From the 440 flies dissected, 146 (33.2%) were parous while 294 (66.8%) were nulliparous. None of the 146 parous flies was found to be infected with any stage of *O. volvulus* larvae during the study period (Table 1). November recorded the highest number of parous flies (84) (57.5%) and gradually declined subsequently till April (8) (5.5%) (Table 2). There was a significant difference in the number of parous and nulliparous flies collected throughout the period of the study ( $p=0.004$ ;  $p<0.05$ ). The number of parous and nulliparous flies decreased on a monthly basis during the study period. The month of November recorded the highest number of both parous (84) and nulliparous (110) flies while April had the least (8 and 23 respectively).

**Table 1:** Transmission Parameters of *Simulium damnosum* complex in the study area

| Variable                                     | Transmission Parameters |
|----------------------------------------------|-------------------------|
| Total flies dissected                        | 440                     |
| No(%) of parous flies                        | 146(33.2)               |
| No(%) of nulliparous flies                   | 294(66.8)               |
| Month(%) with highest parous flies           | November(57.5)          |
| Month(%) with lowest parous flies            | April(5.5)              |
| No of flies infected with <i>O. volvulus</i> | 0                       |

---

|                             |                |
|-----------------------------|----------------|
| Maximum Monthly Biting Rate | 1940(November) |
| Minimum Monthly Biting Rate | 465(April)     |

---

**Table 2:** Monthly variation in parous and nulliparous flies during the study period.

---

| Month    | No of Parous flies (%) | No of Nulliparous flies (%) |
|----------|------------------------|-----------------------------|
| November | 84(58)                 | 110(37)                     |
| December | 26(18)                 | 86(29)                      |
| January  | 16(11)                 | 35(12)                      |
| March    | 12(8)                  | 40(14)                      |
| April    | 8(5)                   | 23(8)                       |

---

## Discussion

The results of the present study showed that the abundance of the flies usually coincide with the wet period, accompanied with high volume of the river and rapids. These conditions usually support the conducive breeding of black flies, thus leading to increase in adult flies population (Crosskey, 1990; Opara *et al.*, 2008). In contrast, the dry season is usually characterized with little or no rapids which could not support the breeding of the black flies. This factor, probably accounted for the low fly population recorded between January and April. This finding is consistent with previously published reports by Crosskey (1999), Opoku (2006), Opara *et al.*, (2008) Adeleke *et al.*, (2011), but contradicts the reports of Mafiana (1988) in Delta State and Adewale *et al.*, (1999) in Owena Dam, Ondo State.

The results of morphotaxonomic studies showed that only the forest dwelling flies colonize and bite at Owena River, Alabameta Community during the study period. Alabameta community is located in a thick forest zone in Osun state. This could have accounted for the preponderance of forest dwelling flies in the area. However, the results is at variance with earlier results in Osun State , Southwestern Nigeria where the sympatric existence of forest and savannah dwelling flies have been reported (Adeleke *et al.*, 2010; Adeleke *et al.*, 2011; Sam-Wobo *et al.*, 2013).

The limitation of wing tuft as a sole diagnostic character was manifested in the variation of wing tuft in the forest flies at the study area. This could as well lead to a gross misidentification of forest flies as savannah flies based on pale wing tuft as earlier posited by Adeleke *et al.*, (2011). It is however difficult to establish if the variations in wing tuft represent different cytospecies within forest dwelling species using morphotaxonomy. In West Africa, *S. damnosum s.l* is said to consist of nine sibling species (Toe *et al.*, 1997). Among the nine siblings, the distribution of *S. leonense*, *S. konkorensis*, *S. dieguerense* and *S. sanctipauli* is restricted to only Sierra Leone, Guinea and

Mali respectively (Garms, 1973; Grunewald, 1976; Fryauff and Trpis, 1986). Further observation on the flies showed that none of them had black trait of all the taxonomic characters, the presence of *S. yahense* could be excluded. *S. yahense* is known to be a dark fly (Wilson *et al.*, 1993). It can therefore be inferred that the sibling species likely to be present in the Alabameta (along Owena River) are *S. squamosum* and *S. soubrense*.

Previous studies in Ogun, Oyan and Osun river systems in Southwestern Nigeria reported the preponderance of *S. soubrense* Beffa (Adeleke *et al.*, 2010; Sam-Wobo *et al.*, 2013). It is not unlikely that *S. soubrense* Beffa could also be the dominant forest flies at the study area. This however needs to be confirmed by molecular or cytotaxonomy through further studies.

Results from this study also showed that there was significant variation in the monthly biting activity of the flies at the study area. Moreover, bimodal peak was recorded for the daily biting rhythm of the flies. The first peak was between 09hr - 11hr in all the months while the second was between 15hr - 17hr except in November where it is between 13hr - 15hr. Similar observations had earlier been reported in the literature (Adewale *et al.*, 1999; Usip *et al.*, 1999; Okolo *et al.*, 2004; Opara *et al.*, 2008). However, the morning peak was higher than the evening peak. This observation dissented from the earlier reports where pronounced peak is usually recorded in the evening. The reason for this observation was not clear but not unlikely to be related to the behaviours of the people in the area. More people are active outdoor during the morning than the evening at the study area. This period coincides with peak of the biting of the flies. Apart from this, it could be as a result of environmental factors that were not monitored during this study. It has been observed that the environmental factors have great influence on the biting behaviours of the black flies (Adeleke *et al.*, 2010b). The influence of environmental factors on the biting behavior in the area could be a subject of further studies.

The results of dissection showed that majority of the flies caught at the study area during the study period were nulliparous. This observation is in consonance with the report of Mafiana (1988) but contrary to the report of Usip *et al.*, (1999); Okolo *et al.*, (2004) and Opara *et al.*, (2008). The high proportion of the nulliparous flies may be as a result of the local production of the flies (Opara *et al.*, 2008). However, the decrease in the parous rate of the flies during the dry season could be attributed to the incomplete dryness of the breeding site (Owena River), thus supporting the development of flies and plausibly an indication of the absence of migratory flies. This observation is contrary to earlier reports by Crosskey (1990) and Adeleke *et al.*, (2010).

The absence of infection in the dissected flies during may be an indication of low level transmission of onchocerciasis along Owena River. Among the factors that could have accounted for the low transmission are level of microfilariae in human hosts, number of surviving microfilariae in insects, vector-species complex and the survival rate of the flies (WHO, 1975; Katholi *et al.*, 1995; Yameogo *et al.*, 1999; Rodringuez *et al.*, 1999).

Lehane (1991) and Adeleke *et al.*, (2010) reported that few out of hundreds of microfilariae ingested by the flies usually survive the effect of the peritrophic membrane that is secreted by the female flies after blood meals. The results of the epidemiological studies (Ojurongbe *et al.*, 2015) showed a very low community microfilarial load at Alabameta community. This could have accounted for the zero infectivity as the flies may not be able to ingest sufficient microfilariae to ensure continuous transmission.

In order to understand further the epidemiology and transmission of onchocerciasis in the study area, it is paramount that molecular studies targeting the aspect of vector competence and parasite-vector complexes be conducted.

## Acknowledgement

I wish to express my profound gratitude to my esteemed teachers and mentors Dr. Ojurongbe O.O and Dr. Adeleke M.A for their distinctive tutelage. Also, is my mum and family. I appreciate all those who have contributed in one way or the other to the accomplishment of this work.

## References

- Adeleke MA, Mafiana CF, Sam-Wobo SO, Olatunde GO, Ekpo UF, Akinwale OP, (2010b). Biting behaviour of *Simulium damnosum complex* and *Onchocerca volvulus* infection along Osun River, southwest Nigeria. *Parasite Vector*, 3(93): 1–5.
- Adeleke B, Mafe MA, Oyerinde JP (1999). Infectivity and transmission dynamics of *Simulium damnosum s.l.* around Owena dam (Ondo State). *West Afr. J. Med.*, 18(4): 257-260.
- Crosskey RW (1990). The natural history of black flies: British Museum of Natural History. London: John Wiley and Sons, pp110.
- Dent, A.E. & Kazura, J.W (2011). Other Tissue Nematodes. Nelson Textbook of Pediatrics 1225-1227.
- Fryauff DJ and Trips M (1986). Identification of larval and adult *Simulium yahense* and *Simulium sanctipauli* based on species- specific enzyme markers and their distribution at different breeding habitats in Central Liberia. *Am J Trop Med Hyg.* 36: 1218-30.
- Garms R, 1973. Quantitative Studies on the transmission of *Onchocerca volvulus* by *Simulium damnosum* in the Bong Range, Liberia. *Tropenmed. Parasit.* 24:358-372.
- Garms, R., Cheke, R. A., Vajime, C. G, Sowah, S. A. (1982). Zeitschrift für Angewandte Zoologie, 69, 219–236.

- Ibeh, O. O., Nwoke, B. E. B., Adegoke, J. A. and Mafuyai, H. B. (2006). Cytospecies identifications of vectors of human onchocerciasis in south eastern Nigeria. *African Journal of Biotechnology*, 5: 1813– 1818.
- Kurtak, D.C., Raybould, J. N. and Vajime, C. G. (1981). Wing tuft colours in the progeny of single individuals of *Simulium squamosum* (Enderlein). *Transaction of the Royal Society of Tropical Medicine and Hygiene*, 75: 126.
- Mafuyai HB, Post RJ, Vajime CG Molyneux DH (1996). Cytotaxonomic identification of the *Simulium damnosum* complex (Diptera: Simuliidae) from Nigeria. *Trop. Med. Int.Health*, 1: 775-785.
- Ojurongbe O, Akindele AA, Adeleke MA, Oyedeji MO, Adedokun SA, Ojo JF (2015) Co-endemicity of Loiasis and Onchocerciasis in Rain Forest Communities in Southwestern Nigeria. *PLoS Negl Trop Dis.*, 9(3): e0003633.
- Okolo CG, Akpa AU, Okonkwo PO (2004). Studies on vectors of Onchocerciasis, *Simulium* species in Achi, Oji River Local Government Area, Enugu State, Nigeria. *Nig J Ent.* 21:84-93.
- Opara KN, Usip LP, Akpabio EE (2008). Transmission dynamics of Onchocerciasis in rural communities of Akwa Ibom State, Nigeria. *J Vector Borne Dis.*, 45:225-230.
- Opoku A.A (2006). The Ecology and Biting Activity of Blackflies (Simuliidae) and the Prevalence of Onchocerciasis in an Agricultural Community in Ghana. *West Africa Journal of Applied Ecology*, Volume 9 (Jan – Jun 2006).
- Oyibo WA, Fagbenro-Beyioku AF (2003). Effect of repeated community based Ivermectin treatment on the intensity of onchocerciasis in Nigeria. *Rur. Rem. Health J.*, 3: 211-221.
- Rodriguez-Peres MA, Davis-Lozano R, Rodriguez MH, Unaasch TR, Bradley JE (1999). Detection of *Onchocerca volvulus* infection in *Simulium ochraceum*. I: comparison of a Polymerase Chain Reaction assay and fly dissection in a Mexican hypo endemic community *Parasitol.* 119:613-619.
- Sam-Wobo S.O, Adeleke M.A, Jayeola O.A, Adeyi A.O, Oluwole A.S, Adewale B, Mafiana C.F, Bissan Y, Toe´ L, Yameogo L, Mutabaruka E and Amazigo U.V (2013). Seasonal fluctuations of *Simulium damnosum* complex and *Onchocerca* microfilarial evaluation in

- river systems, South-west Nigeria. *International Journal of Tropical Insect Science* Vol. 33, No. 1, pp. 2–7.
- Toe L., Tang J., Back C., Katholi C. R. and Unnasch T. R. (1997) Vector–parasite transmission complexes for onchocerciasis in West Africa. *Lancet*, 349: 163–166.
- World Health Organization (1995). Onchocerciasis and its control, report of a WHO Expert Committee on Onchocerciasis Control. Geneva. *Technical Report Series* No. 852.
- World Health Organization (1976). WHO Expert Committee on epidemiology of onchocerciasis WHO. *Tech. Rep. Ser.* 597, WHO, Geneva.
- Yameogo, L., Toe, L., Houghard, J. M., Boatin, B. A., and Unnasch, T. R. (1999). Pool screening Polymerase Chain Reaction for estimating the prevalence of *Onchocerca volvulus* infection in *Simulium damnosum* s.l: results of a field trial in an area subject to successful vector control. *American Journal of Tropical Medicine and Hygiene*, 60:124-128.
- Wilson, M. D., Post, R. J. and Gomulski, L. M. (1993). Multivariate morphotaxonomy in the identification of adult females of the *Simulium damnosum* Theobald complex (Diptera: Simuliidae) in the Onchocerciasis Control Programme Area of West Africa. *Annals of Tropical Medicine and Parasitology*, 87: 65 – 82.
- Mafiana, C. F. (1988). Studies on Onchocerciasis and *Simulium damnosum* in Igbo – Uwa, Bendel State, Nigeria. PhD Thesis, University of Benin. 183 pp.
- Katholi CR, Toe L, Merriweather A, Unaasch TR (1995). Determining the prevalence of *Onchocerca volvulus* infection in vector populations by Polymerase Chain Reaction screening of pools of black flies. *J Inf Dis.*, 172:1414-1417.
- Opara KN, Fagbemi BO, Ekwe A, Okenu DMN (2005a). Status of forest onchocerciasis in the lower cross river basin, Nigeria. Entomologic profile after five years of ivermectin intervention. *Am J Trop Med Hyg.* 73(2): 371–6.
- World Health Organization (1975). Epidemiology of Onchocerciasis. *WHO Technical Report Series* no 597; 94pp.



Adeleke MA, Mafiana CF, Sam-Wobo SO, Olatunde GO, Ekpo UF, Akinwale OP, (2010). Biting behaviour of *Simulium damnosum complex* and *Onchocerca volvulus* infection along Osun River, southwest Nigeria. *Parasite Vector*; 3(93): 1–5.

Adeleke, M.A, Mafiana, C.F, Sam-Wobo, S.O, Olatunde, G.O, Akinwale, O.P (2010c). Morphotaxonomic studies on *Simulium damnosum Theobald* complex along Osun River, Southwestern, Nigeria. *Acta Entomologica Sinica*, 53(11) : 1319-1324.

Adeleke, M. A., Sam-Wobo, S. O., Olatunde, G. O., Akinwale, O. P., Ekpo, U. F., Mafiana, C. F. (2011b). Bioecology of *Simulium damnosum* Theobald complex along Osun River,

Usip LPE, Opara KN, Ibanga ES, Atting IA: Longitudinal evaluation of repellent activity of *Ocimum gratissimum* (Labiatae) volatile oil against *Simulium damnosum*. *Mem Insts Oswaldo Cruz*1999,101:201-205.
